# Supplementary material
Source: Springer Nature journal article supplement (https://www.springermedizin.de/resource/supplementary/12885_2014_4731_MOESM4_ESM.pdf/9467088)

**Additional File 4: Intra-patient reproducibility – Patient 2**

Colon Tumor

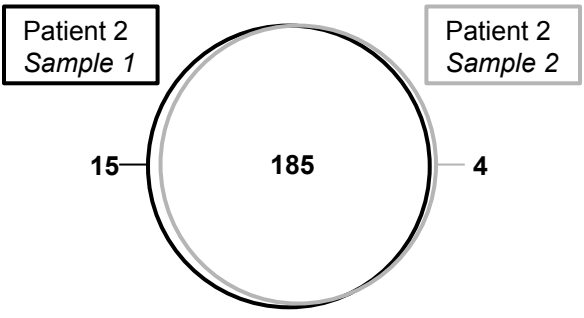

Liver Metastasis

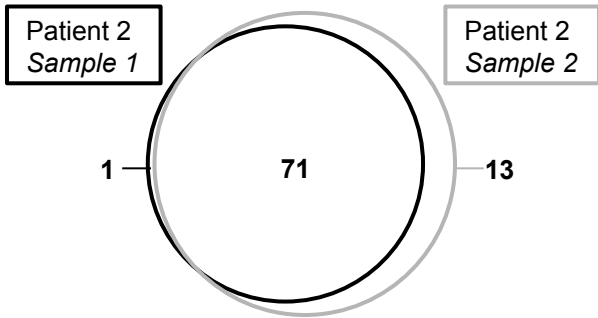

Supplement: MOESM4 [file 9467088]
